# Supplementary material for: The triple combination of tenofovir, emtricitabine and efavirenz shows synergistic anti-HIV-1 activity in vitro: a mechanism of action study
Source: Springer Nature journal article supplement (doi:10.1186/1742-4690-6-44), 2009-05-13

**A**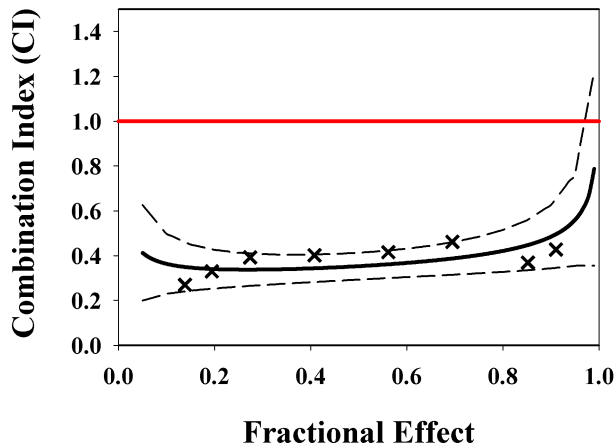**B**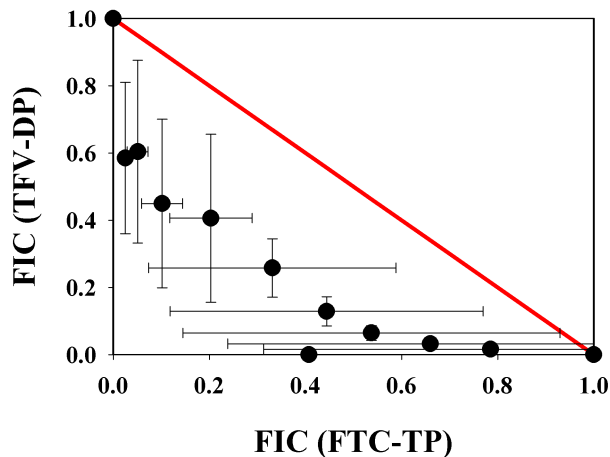**C**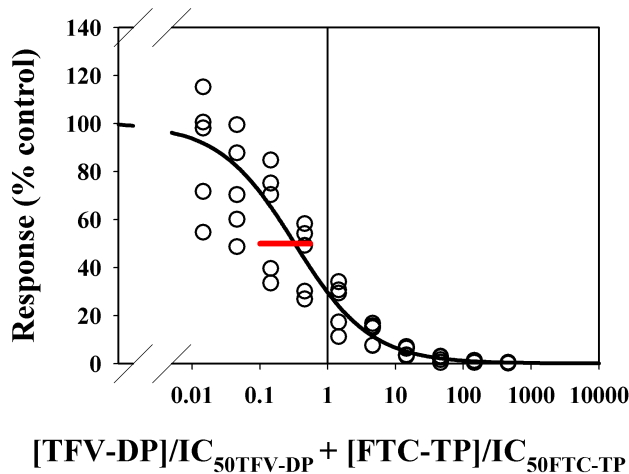**D**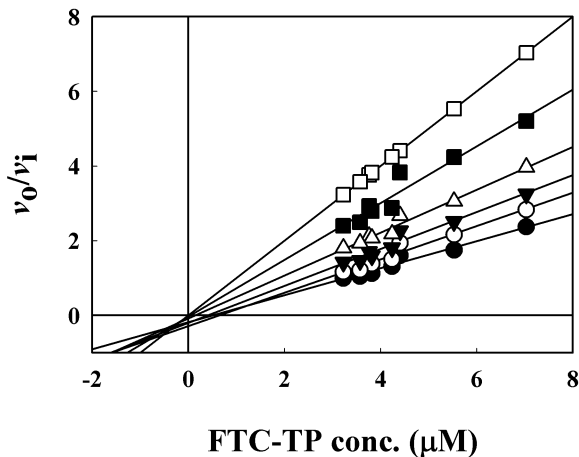

Supplement: 12977_2009_1049_MOESM4_ESM.pdf [file 12977_2009_1049_MOESM4_ESM.pdf]
